# Supplementary material for: Qualitative Characterization of Unrefined Durum Wheat Air-Classified Fractions
Source: MDPI journal article supplement (doi:10.3390/foods10112817), 2021-11-16
Supplement: s1 [file s1]

**Table S1.** Phenolic acid profiles ( $\mu\text{g/g}$  dry matter) and antioxidant activity ( $\mu\text{eq Trolox/g}$  dry matter) of un-cooked pasta made with air-classified fractions (F250, G250, G230) and semolina obtained from three durum grain samples (Saragolla\_LA, Antalis\_BA, Antalis\_MA). Same letters within columns indicate not significant difference ( $p < 0.05$ ).

| Grain sample | Milling product | <i>p</i> -Hydroxy benzoic acid | Syringic acid            | Vanillic acid           | <i>p</i> -Coumaric acid | Ferulic acid              | Sinapic acid             | TEAC                    |
|--------------|-----------------|--------------------------------|--------------------------|-------------------------|-------------------------|---------------------------|--------------------------|-------------------------|
| Saragolla_LA | F250            | 5.89±0.03 <sup>a</sup>         | 9.84±0.02 <sup>a</sup>   | 12.94±0.08 <sup>a</sup> | 10.53±0.14 <sup>a</sup> | 540.75±1.41 <sup>a</sup>  | 33.17±0.76 <sup>a</sup>  | 10.80±0.14 <sup>a</sup> |
|              | G250            | 3.64±0.03 <sup>b</sup>         | 5.64±0.04 <sup>b</sup>   | 7.17±0.06 <sup>bc</sup> | 4.87±0.08 <sup>cd</sup> | 443.80±1.92 <sup>c</sup>  | 24.03±1.88 <sup>b</sup>  | 7.87±0.06 <sup>b</sup>  |
|              | G230            | 3.53±0.03 <sup>b</sup>         | 5.41±0.17 <sup>b</sup>   | 7.27±0.06 <sup>bc</sup> | 4.92±0.06 <sup>cd</sup> | 430.65±5.00 <sup>c</sup>  | 26.05±0.59 <sup>b</sup>  | 5.35±0.17 <sup>c</sup>  |
|              | Semolina        | 1.24±0.01 <sup>cd</sup>        | 1.88±0.01 <sup>e</sup>   | 1.22±0.01 <sup>d</sup>  | 0.07±0.01 <sup>f</sup>  | 70.20±2.23 <sup>h</sup>   | 3.32±0.03 <sup>c</sup>   | 1.14±0.03 <sup>e</sup>  |
| Antalis_BA   | F250            | 2.41±0.54 <sup>bcd</sup>       | 1.51±0.05 <sup>e</sup>   | 9.94±0.04 <sup>ab</sup> | 8.38±0.14 <sup>b</sup>  | 506.15±4.86 <sup>b</sup>  | 23.36±0.52 <sup>b</sup>  | 8.52±0.12 <sup>b</sup>  |
|              | G250            | 2.57±0.01 <sup>bc</sup>        | 2.57±0.35 <sup>de</sup>  | 4.59±0.45 <sup>cd</sup> | 5.48±0.02 <sup>cd</sup> | 310.47±5.02 <sup>ef</sup> | 28.15±1.27 <sup>ab</sup> | 5.23±0.00 <sup>c</sup>  |
|              | G230            | 1.24±0.33 <sup>cd</sup>        | 1.51±0.06 <sup>e</sup>   | 2.39±0.12 <sup>d</sup>  | 2.39±0.56 <sup>e</sup>  | 287.06±4.48 <sup>f</sup>  | 11.55±0.59 <sup>c</sup>  | 5.15±0.07 <sup>c</sup>  |
|              | Semolina        | 1.09±0.04 <sup>d</sup>         | 1.56±0.22 <sup>e</sup>   | 1.34±0.08 <sup>d</sup>  | 0.74±0.05 <sup>ef</sup> | 69.25±0.05 <sup>h</sup>   | 6.63±0.35 <sup>c</sup>   | 1.11±0.01 <sup>e</sup>  |
| Antalis_MA   | F250            | 3.53±0.02 <sup>b</sup>         | 4.18±0.00 <sup>bcd</sup> | 6.69±1.69 <sup>bc</sup> | 6.73±0.11 <sup>bc</sup> | 397.31±2.62 <sup>d</sup>  | 30.30±0.78 <sup>ab</sup> | 6.24±0.26 <sup>c</sup>  |
|              | G250            | 3.36±0.21 <sup>b</sup>         | 4.92±0.64 <sup>bc</sup>  | 6.05±0.15 <sup>c</sup>  | 7.23±0.62 <sup>bc</sup> | 260.09±4.64 <sup>g</sup>  | 18.49±0.33 <sup>b</sup>  | 3.80±0.43 <sup>d</sup>  |
|              | G230            | 2.73±0.12 <sup>b</sup>         | 3.57±0.12 <sup>cd</sup>  | 4.29±0.35 <sup>cd</sup> | 4.73±0.16 <sup>d</sup>  | 273.84±3.36 <sup>fg</sup> | 23.21±1.20 <sup>b</sup>  | 5.35±0.17 <sup>c</sup>  |
|              | Semolina        | 1.04±0.23 <sup>d</sup>         | 1.63±0.24 <sup>e</sup>   | 1.18±0.23 <sup>d</sup>  | 0.69±0.32 <sup>ef</sup> | 71.77±1.40 <sup>h</sup>   | 6.33±0.33 <sup>c</sup>   | 1.11±0.01 <sup>e</sup>  |

**Table S2.** Phenolic acid profiles ( $\mu\text{g/g}$  dry matter) and antioxidant activity ( $\mu\text{eq Trolox/g}$  dry matter) of cooked pasta made with air-classified fractions (F250, G250, G230) and semolina obtained from three durum grain samples (Saragolla\_LA, Antalis\_BA, Antalis\_MA). Same letters within columns indicate not significant difference ( $p < 0.05$ ).

| Grain sample | Milling product | <i>p</i> -Hydroxy benzoic acid | Syringic acid           | Vanillic acid           | <i>p</i> -Coumaric acid  | Ferulic acid             | Sinapic acid              | TEAC                    |
|--------------|-----------------|--------------------------------|-------------------------|-------------------------|--------------------------|--------------------------|---------------------------|-------------------------|
| Saragolla_LA | F250            | 4.35±0.23 <sup>a</sup>         | 7.72±0.24 <sup>a</sup>  | 8.58±0.61 <sup>a</sup>  | 9.05±0.47 <sup>a</sup>   | 504.66±8.03 <sup>a</sup> | 31.28±0.89 <sup>a</sup>   | 8.33±0.02 <sup>a</sup>  |
|              | G250            | 2.14±0.02 <sup>bc</sup>        | 3.38±0.04 <sup>bc</sup> | 4.12±0.01 <sup>bc</sup> | 3.13±0.01 <sup>bcd</sup> | 340.66±7.48 <sup>d</sup> | 24.55±0.07 <sup>abc</sup> | 5.71±0.14 <sup>b</sup>  |
|              | G230            | 1.06±0.13 <sup>cd</sup>        | 1.23±0.04 <sup>c</sup>  | 1.68±0.21 <sup>bc</sup> | 1.39±0.66 <sup>cde</sup> | 282.30±3.99 <sup>e</sup> | 12.75±2.76 <sup>ef</sup>  | 5.17±0.05 <sup>bc</sup> |
|              | Semolina        | 0.43±0.05 <sup>d</sup>         | 0.76±0.23 <sup>c</sup>  | 0.75±0.16 <sup>c</sup>  | 0.24±0.07 <sup>e</sup>   | 45.53±7.85 <sup>h</sup>  | 6.55±1.59 <sup>f</sup>    | 0.90±0.09 <sup>f</sup>  |
| Antalis_BA   | F250            | 1.73±0.03 <sup>bc</sup>        | 2.58±0.30 <sup>bc</sup> | 4.08±0.93 <sup>bc</sup> | 5.02±0.67 <sup>b</sup>   | 460.15±2.38 <sup>b</sup> | 19.00±0.08 <sup>bcd</sup> | 7.62±0.12 <sup>a</sup>  |
|              | G250            | 1.56±0.16 <sup>bcd</sup>       | 1.47±0.16 <sup>bc</sup> | 2.36±0.45 <sup>bc</sup> | 2.76±0.15 <sup>bcd</sup> | 164.07±6.21 <sup>g</sup> | 16.15±1.76 <sup>de</sup>  | 2.88±0.03 <sup>e</sup>  |
|              | G230            | 1.79±0.12 <sup>bc</sup>        | 2.16±0.16 <sup>bc</sup> | 2.77±0.18 <sup>bc</sup> | 3.92±0.37 <sup>bc</sup>  | 212.07±6.41 <sup>f</sup> | 19.76±0.11 <sup>bcd</sup> | 4.74±0.12 <sup>cd</sup> |
|              | Semolina        | 0.80±0.13 <sup>d</sup>         | 0.95±0.10 <sup>c</sup>  | 0.83±0.12 <sup>c</sup>  | 0.43±0.28 <sup>de</sup>  | 57.26±8.06 <sup>h</sup>  | 6.95±1.01 <sup>f</sup>    | 0.90±0.00 <sup>f</sup>  |
| Antalis_MA   | F250            | 2.64±0.44 <sup>b</sup>         | 4.06±1.32 <sup>b</sup>  | 4.77±1.49 <sup>ab</sup> | 8.33±0.54 <sup>a</sup>   | 402.29±5.75 <sup>c</sup> | 16.71±0.43 <sup>cde</sup> | 1.11±0.03 <sup>f</sup>  |
|              | G250            | 2.66±0.02 <sup>b</sup>         | 2.93±0.01 <sup>bc</sup> | 3.44±0.04 <sup>bc</sup> | 4.46±0.45 <sup>b</sup>   | 277.95±4.38 <sup>e</sup> | 26.08±0.17 <sup>ab</sup>  | 5.19±0.15 <sup>bc</sup> |
|              | G230            | 2.09±0.13 <sup>bc</sup>        | 2.36±0.08 <sup>bc</sup> | 2.70±0.15 <sup>bc</sup> | 3.47±0.06 <sup>bcd</sup> | 252.14±5.37 <sup>e</sup> | 21.76±1.28 <sup>bcd</sup> | 4.74±0.01 <sup>cd</sup> |
|              | Semolina        | 1.25±0.01 <sup>cd</sup>        | 1.56±0.04 <sup>bc</sup> | 1.05±0.03 <sup>bc</sup> | 0.83±0.03 <sup>de</sup>  | 73.25±3.69 <sup>h</sup>  | 9.57±0.12 <sup>ef</sup>   | 4.41±0.01 <sup>d</sup>  |

**Table S3.** Anti-ATI polyclonal antibodies on micronized wholemeal, F250, G250, G230 air-classified fractions, and semolina from three durum grain samples. Different letters indicate significant differences (p<0.05) within columns.

| Durum wheat grain sample | Milling type | Dilution                 |                          |                          |                        |
|--------------------------|--------------|--------------------------|--------------------------|--------------------------|------------------------|
|                          |              | 1:20                     | 1:200                    | 1:2000                   | 1:20000                |
| Saragolla_LA             | Micronized   | 0.25±0.03 <sup>efg</sup> | 0.14±0.01 <sup>hi</sup>  | 0.08±0.01 <sup>g</sup>   | 0.06±0.00 <sup>a</sup> |
|                          | Semolina     | 0.36±0.02 <sup>ab</sup>  | 0.26±0.01 <sup>a</sup>   | 0.17±0.01 <sup>a</sup>   | 0.08±0.00 <sup>a</sup> |
|                          | F250         | 0.31±0.01 <sup>bcd</sup> | 0.20±0.01 <sup>c-f</sup> | 0.11±0.01 <sup>def</sup> | 0.06±0.00 <sup>a</sup> |
|                          | G250         | 0.33±0.01 <sup>bc</sup>  | 0.24±0.01 <sup>abc</sup> | 0.14±0.01 <sup>bc</sup>  | 0.08±0.00 <sup>a</sup> |
|                          | G230         | 0.19±0.00 <sup>hi</sup>  | 0.13±0.01 <sup>i</sup>   | 0.14±0.01 <sup>bc</sup>  | 0.09±0.02 <sup>a</sup> |
| Antalis_BA               | Micronized   | 0.30±0.01 <sup>cde</sup> | 0.19±0.02 <sup>d-g</sup> | 0.10±0.01 <sup>ef</sup>  | 0.06±0.00 <sup>a</sup> |
|                          | Semolina     | 0.38±0.00 <sup>a</sup>   | 0.25±0.00 <sup>ab</sup>  | 0.15±0.00 <sup>b</sup>   | 0.08±0.01 <sup>a</sup> |
|                          | F250         | 0.27±0.01 <sup>d-g</sup> | 0.17±0.01 <sup>fgh</sup> | 0.11±0.01 <sup>ef</sup>  | 0.09±0.02 <sup>a</sup> |
|                          | G250         | 0.33±0.02 <sup>bc</sup>  | 0.21±0.01 <sup>cde</sup> | 0.12±0.01 <sup>cde</sup> | 0.08±0.00 <sup>a</sup> |
|                          | G230         | 0.33±0.00 <sup>abc</sup> | 0.27±0.01 <sup>a</sup>   | 0.15±0.00 <sup>ab</sup>  | 0.09±0.04 <sup>a</sup> |
| Antalis_MA               | Micronized   | 0.22±0.00 <sup>gh</sup>  | 0.18±0.01 <sup>e-h</sup> | 0.11±0.01 <sup>ef</sup>  | 0.06±0.00 <sup>a</sup> |
|                          | Semolina     | 0.31±0.00 <sup>cd</sup>  | 0.23±0.01 <sup>abc</sup> | 0.14±0.00 <sup>b</sup>   | 0.08±0.00 <sup>a</sup> |
|                          | F250         | 0.24±0.01 <sup>fg</sup>  | 0.16±0.00 <sup>ghi</sup> | 0.10±0.00 <sup>fg</sup>  | 0.06±0.00 <sup>a</sup> |
|                          | G250         | 0.27±0.01 <sup>def</sup> | 0.22±0.00 <sup>bcd</sup> | 0.13±0.00 <sup>bcd</sup> | 0.07±0.00 <sup>a</sup> |
|                          | G230         | 0.15±0.01 <sup>i</sup>   | 0.21±0.00 <sup>cde</sup> | 0.13±0.01 <sup>bcd</sup> | 0.08±0.01 <sup>a</sup> |
